# Supplementary material
Source: MDPI journal article supplement (https://www.mdpi.com/2077-0472/14/2/194)
Supplement: s1 [file s1]

**A**

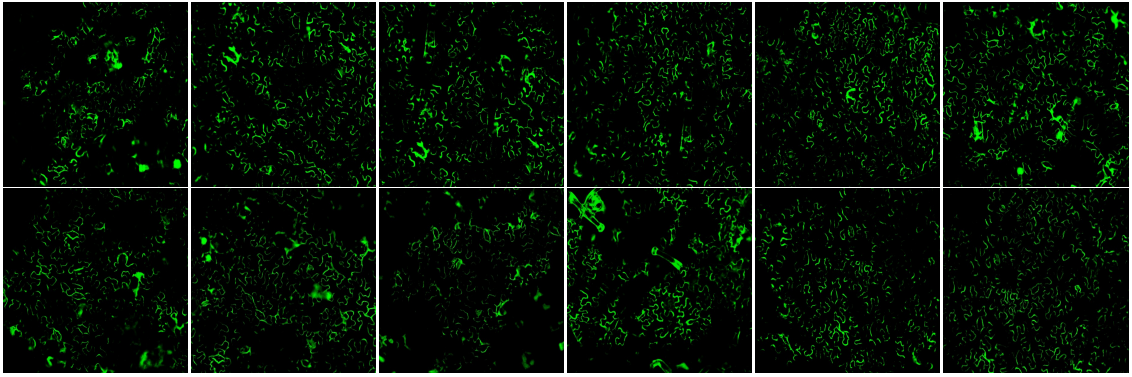

**B**

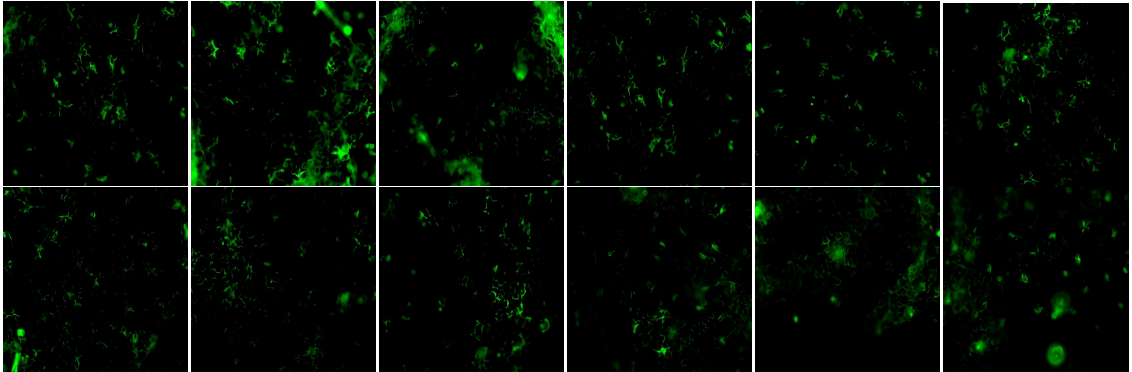

**C**

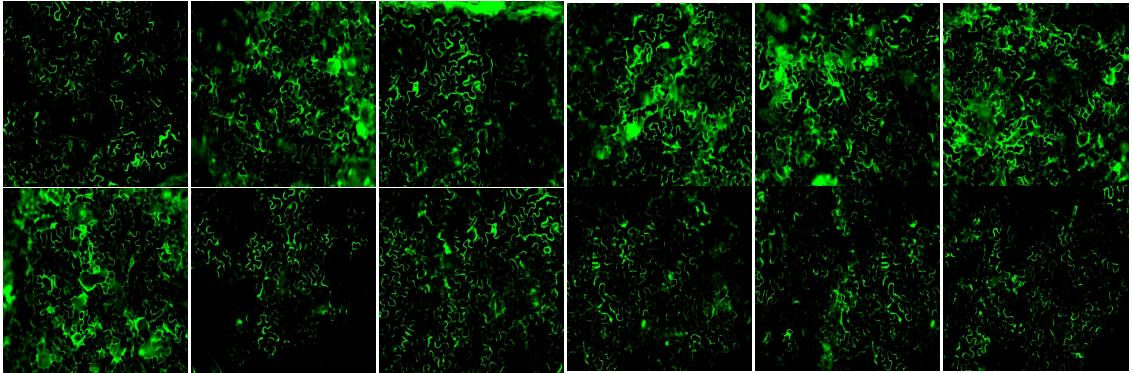

**D**

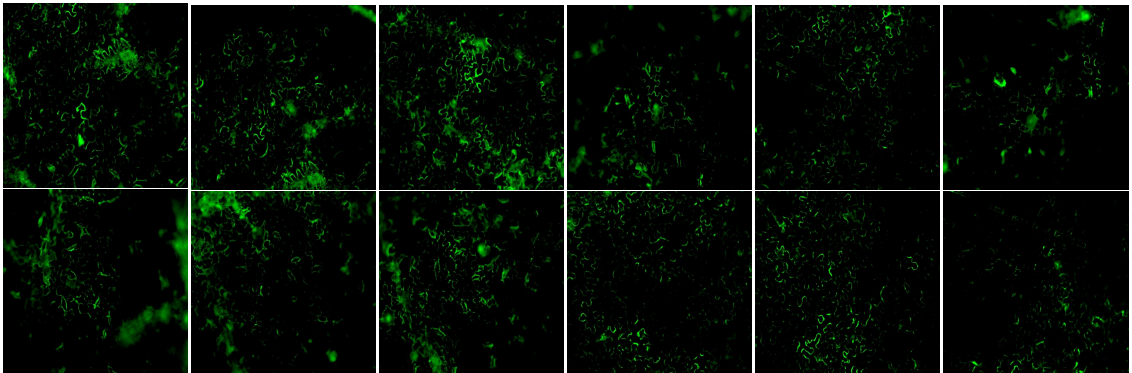

**E**

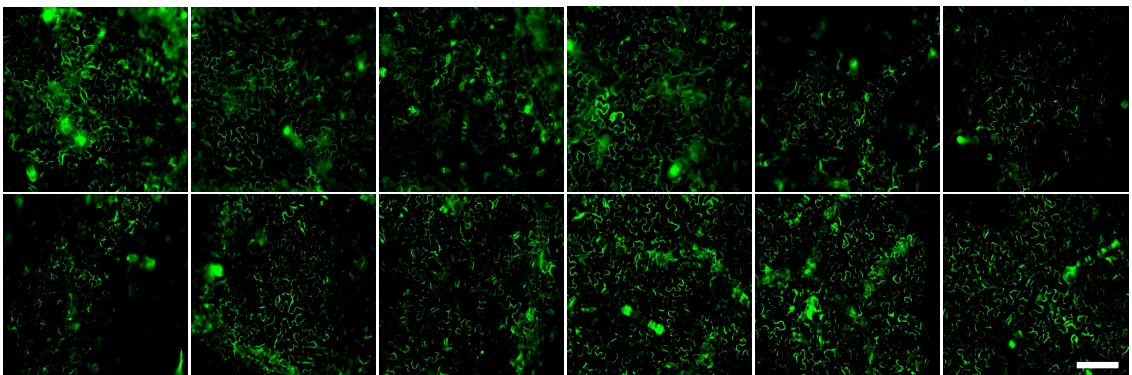

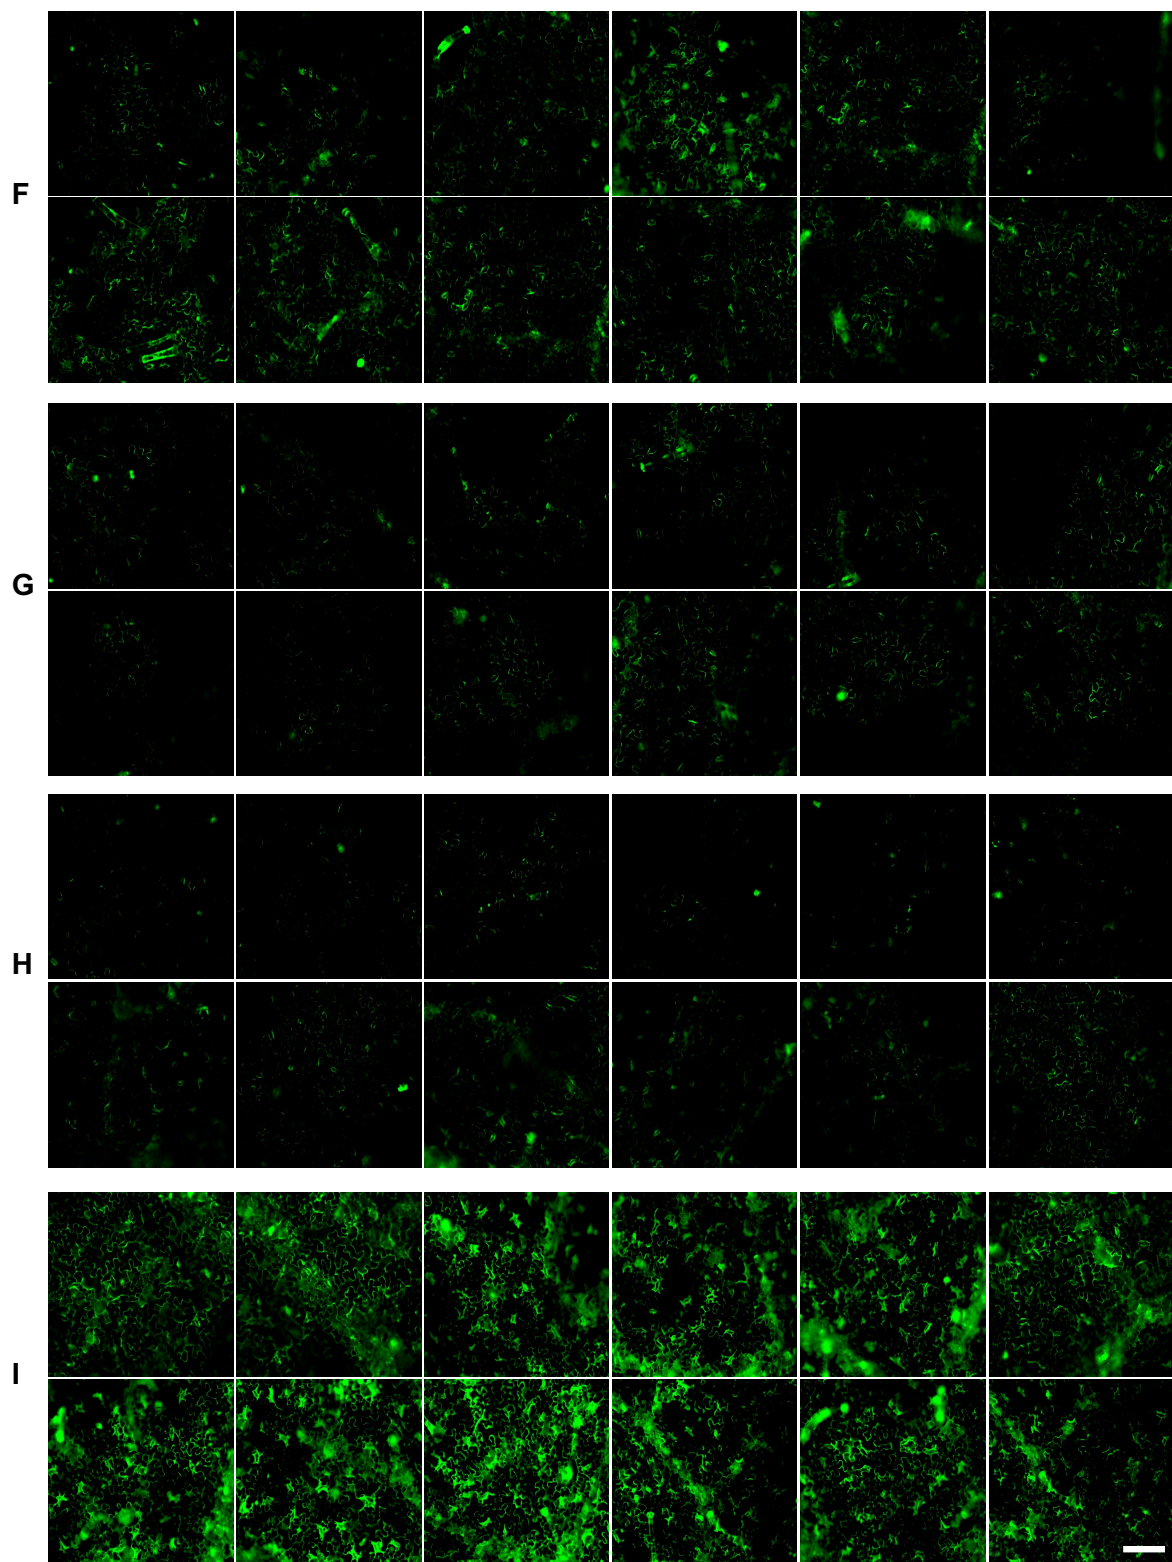

**Supplementary Figure 1.** Infiltrated leaf tissue showing suppression of GFP silencing from Figure 2A was examined using a fluorescence microscope. Selected images used to analyze relative green fluorescence intensity (Figure 2B) are shown. (A; 16C, B; GFP, C; P0<sup>y</sup>, D; P0<sup>AL</sup>, E; P0<sup>L68A</sup>, F; P0<sup>P69A</sup>, G; P0<sup>F71I</sup>, H; P0<sup>F71L</sup>, I; P0<sup>V72I</sup>). Scale bar = 180  $\mu$ m.
